# Supplementary material for: The genetic etiology of hearing loss in Japan revealed by the social health insurance-based genetic testing of 10K patients
Source: PubMed Central journal article supplement (PMC9035015; doi:10.1007/s00439-021-02371-3), 2021-10-01
Supplement: 439_2021_2371_MOESM1_ESM.pdf [file 439_2021_2371_MOESM1_ESM.pdf]

**Supplementa Table 1.** Genes including in Ion AmpliSeq™ Hearing Loss Research Panel v1

| Gene Name       | Chromosome | Num_Amplicons | Total_Bases | Covered_Bases | Overall_Coverage |
|-----------------|------------|---------------|-------------|---------------|------------------|
| <i>ACTG1</i>    | chr17      | 11            | 1183        | 1183          | 1                |
| <i>CCDC50</i>   | chr3       | 20            | 1581        | 1572          | 0.9943           |
| <i>CDH23</i>    | chr10      | 108           | 12291       | 12289         | 0.99984          |
| <i>CEACAM16</i> | chr19      | 14            | 1344        | 1335          | 0.9933           |
| <i>CLDN14</i>   | chr21      | 6             | 812         | 812           | 1                |
| <i>COCH</i>     | chr14      | 20            | 1774        | 1767          | 0.9961           |
| <i>COL11A2</i>  | chr6       | 73            | 6215        | 6203          | 0.9981           |
| <i>CRYM</i>     | chr16      | 11            | 1088        | 1088          | 1                |
| <i>DFNA5</i>    | chr7       | 16            | 1685        | 1681          | 0.9976           |
| <i>DIAPH1</i>   | chr5       | 40            | 4127        | 4107          | 0.9952           |
| <i>ESPN</i>     | chr1       | 26            | 2708        | 2511          | 0.9273           |
| <i>ESRRB</i>    | chr14      | 14            | 1615        | 1615          | 1                |
| <i>EYA4</i>     | chr6       | 32            | 2241        | 2235          | 0.9973           |
| <i>GIPC3</i>    | chr19      | 10            | 1005        | 835           | 0.8308           |
| <i>GJB2</i>     | chr13      | 5             | 714         | 714           | 1                |
| <i>GJB3</i>     | chr1       | 10            | 3228        | 3228          | 1                |
| <i>GJB6</i>     | chr13      | 6             | 812         | 812           | 1                |
| <i>GPSM2</i>    | chr1       | 29            | 2209        | 2148          | 0.9724           |
| <i>GRHL2</i>    | chr8       | 23            | 2054        | 2054          | 1                |
| <i>GRXCR1</i>   | chr4       | 9             | 917         | 917           | 1                |
| <i>HGF</i>      | chr7       | 32            | 2705        | 2685          | 0.9926           |
| <i>ILDR1</i>    | chr3       | 14            | 1729        | 1729          | 1                |
| <i>KCNQ4</i>    | chr1       | 21            | 2242        | 1974          | 0.8805           |
| <i>LHFPL5</i>   | chr6       | 7             | 693         | 693           | 1                |
| <i>LOXHD1</i>   | chr18      | 74            | 8125        | 8079          | 0.9943           |
| <i>LRTOMT</i>   | chr11      | 15            | 1644        | 1593          | 0.969            |
| <i>MARVELD2</i> | chr5       | 15            | 1743        | 1687          | 0.9679           |
| <i>MSRB3</i>    | chr12      | 11            | 732         | 732           | 1                |
| <i>MYH14</i>    | chr19      | 66            | 6573        | 6570          | 0.9995           |
| <i>MYH9</i>     | chr22      | 65            | 6323        | 6318          | 0.9992           |
| <i>MYO15A</i>   | chr17      | 103           | 11297       | 10711         | 0.94813          |
| <i>MYO1A</i>    | chr12      | 34            | 3429        | 3425          | 0.9988           |
| <i>MYO3A</i>    | chr10      | 60            | 5214        | 5112          | 0.9804           |
| <i>MYO6</i>     | chr6       | 57            | 4232        | 3923          | 0.927            |
| <i>MYO7A</i>    | chr11      | 80            | 7652        | 7617          | 0.9954           |
| <i>OTOA</i>     | chr16      | 31            | 3788        | 2839          | 0.7495           |
| <i>OTOF</i>     | chr2       | 71            | 7115        | 7086          | 0.9959           |
| <i>PCDH15</i>   | chr10      | 86            | 8466        | 8365          | 0.9881           |
| <i>DFNB59</i>   | chr2       | 14            | 1125        | 1125          | 1                |
| <i>POU4F3</i>   | chr5       | 7             | 1039        | 1039          | 1                |
| <i>PTPRQ</i>    | chr12      | 83            | 6846        | 6445          | 0.9414           |
| <i>RDX</i>      | chr11      | 23            | 1895        | 1807          | 0.9536           |
| <i>SERPINB6</i> | chr6       | 14            | 1197        | 1197          | 1                |
| <i>SLC17A8</i>  | chr12      | 18            | 1902        | 1873          | 0.9848           |
| <i>SLC26A4</i>  | chr7       | 31            | 2563        | 2482          | 0.9684           |
| <i>SLC26A5</i>  | chr7       | 25            | 2509        | 2432          | 0.9693           |
| <i>SMAC</i>     | chr12      | 7             | 786         | 786           | 1                |
| <i>STRC</i>     | chr15      | 25            | 5647        | 2010          | 0.3559           |
| <i>TECTA</i>    | chr11      | 54            | 6721        | 6698          | 0.9966           |
| <i>TJP2</i>     | chr9       | 43            | 4455        | 4253          | 0.9547           |
| <i>TMC1</i>     | chr9       | 30            | 2503        | 2386          | 0.9533           |
| <i>TMIE</i>     | chr3       | 6             | 515         | 515           | 1                |
| <i>TMPRSS3</i>  | chr21      | 14            | 1761        | 1684          | 0.9563           |
| <i>TPRN</i>     | chr9       | 13            | 2180        | 1582          | 0.7257           |
| <i>TRIOBP</i>   | chr22      | 59            | 7645        | 7273          | 0.9513           |
| <i>USH1C</i>    | chr11      | 38            | 3106        | 3106          | 1                |
| <i>WFS1</i>     | chr4       | 21            | 2750        | 2607          | 0.948            |
| <i>WHRN</i>     | chr9       | 25            | 3074        | 2998          | 0.9753           |
| <i>POU3F4</i>   | chrX       | 8             | 1097        | 1089          | 0.9927           |
| <i>PRPS1</i>    | chrX       | 11            | 1137        | 1137          | 1                |
| <i>SMPX</i>     | chrX       | 4             | 300         | 300           | 1                |
| <i>USH2A</i>    | chr1       | 164           | 16646       | 16567         | 0.99525          |
| <i>MIRN96</i>   | chr7       | 2             | 78          | 78            | 1                |
